# Supplementary material
Source: PubMed Central journal article supplement (PMC5084081)
Supplement: oc6b00219_si_001.pdf [file oc6b00219_si_001.pdf]

# Supporting Information for Neural networks for the prediction of organic chemistry reactions

Jennifer N. Wei,<sup>†</sup> David Duvenaud,<sup>‡</sup> and Alán Aspuru-Guzik<sup>\*,†</sup>

*Department of Chemistry and Chemical Biology, Harvard University, Cambridge MA 02138, USA, and Department of Computer Science, Harvard University, Cambridge MA 02138, USA*

E-mail: [aspuru@chemistry.harvard.edu](mailto:aspuru@chemistry.harvard.edu)

Table 1 shows the Tanimoto similarity of the training set to problems Wade 8-47 and 8-48 used in the main article. The code and all data used in our paper can all be found at [https://github.com/jnwei/neural\\_reaction\\_fingerprint.git](https://github.com/jnwei/neural_reaction_fingerprint.git)

---

<sup>\*</sup>To whom correspondence should be addressed

<sup>†</sup>Department of Chemistry and Chemical Biology, Harvard University, Cambridge MA 02138, USA

<sup>‡</sup>Department of Computer Science, Harvard University, Cambridge MA 02138, USA

**Supporting Information Table 1:** Similarity between selected textbook questions and training set questions.

| Problem number | Average Training Set Tanimoto Similarity | Highest Training Set Tanimoto Similarity |
|----------------|------------------------------------------|------------------------------------------|
| 8-47a          | 0.30                                     | 0.94                                     |
| 8-47b          | 0.42                                     | 0.74                                     |
| 8-47c          | 0.47                                     | 0.86                                     |
| 8-47d          | 0.41                                     | 0.76                                     |
| 8-47e          | 0.47                                     | 0.88                                     |
| 8-47f          | 0.47                                     | 0.88                                     |
| 8-47g          | 0.35                                     | 0.65                                     |
| 8-47h          | 0.42                                     | 0.75                                     |
| 8-47i          | 0.43                                     | 0.80                                     |
| 8-47j          | 0.48                                     | 0.76                                     |
| 8-47l          | 0.44                                     | 0.77                                     |
| 8-47m          | 0.43                                     | 0.82                                     |
| 8-47n          | 0.45                                     | 0.75                                     |
| 8-47o          | 0.44                                     | 0.75                                     |
| 8-47p          | 0.44                                     | 0.76                                     |
| 8-48a          | 0.42                                     | 0.78                                     |
| 8-48b          | 0.42                                     | 0.77                                     |
| 8-48c          | 0.31                                     | 1.00                                     |
| 8-48d          | 0.34                                     | 0.54                                     |
| 8-48e          | 0.19                                     | 0.71                                     |
| 8-48f          | 0.20                                     | 0.66                                     |
| 8-48g          | 0.33                                     | 0.48                                     |
